# Supplementary material for: Characterization of Three-Dimensional Trophoblast Spheroids: An Alternative Model to Study the Physiological Properties of the Placental Unit
Source: MDPI journal article supplement (doi:10.3390/cells11182884), 2022-09-15
Supplement: s1 [file s1]

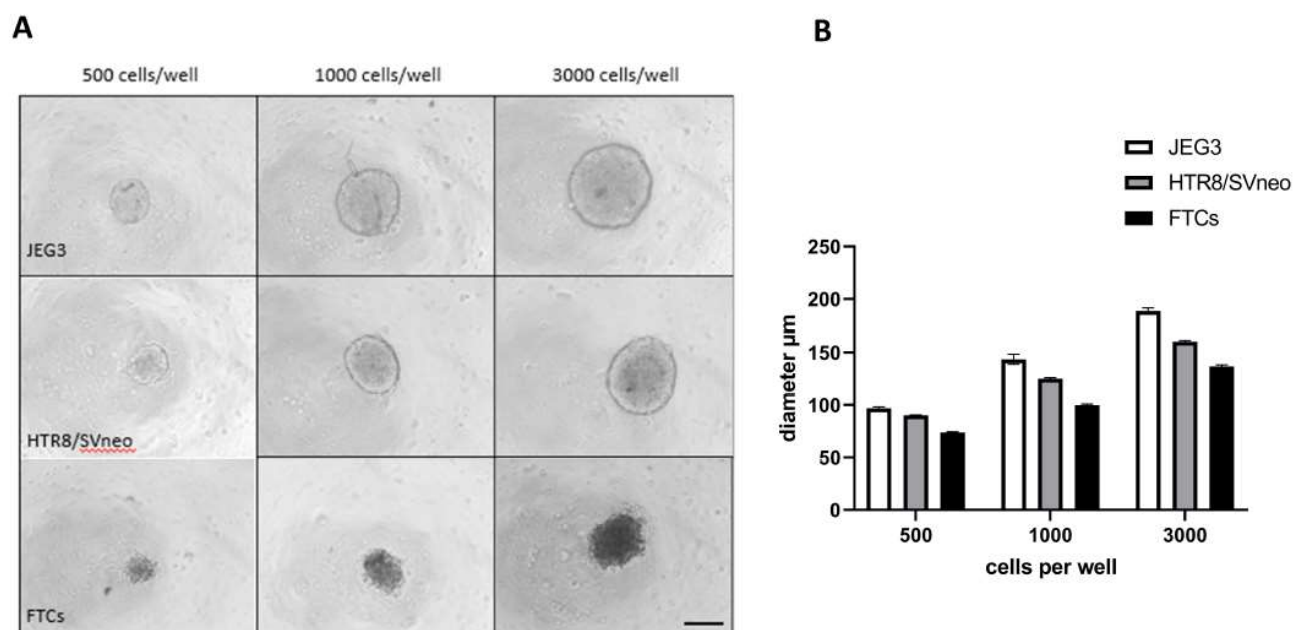

**Figure S1.** Cell seeding densities establishment for trophoblast spheroids. Bright-field images of JEG3, HTR8/SVneo and FTCs spheroids, scale bar 100 µm (A) and growth size in function of diameter after 24 hours post-seeding (B).
